1           **ΦCrAss001, a member of the most abundant bacteriophage family in the human gut,**  
2                                   **infects *Bacteroides***

3

4           Andrey N. Shkoporov, Ekaterina V. Khokhlova, C. Brian Fitzgerald, Stephen R. Stockdale,  
5                                   Lorraine A. Draper, R. Paul Ross, Colin Hill

6                                   APC Microbiome Ireland, University College Cork, Cork, Ireland

7

8           Abstract

9           ΦCrAss001, isolated from human faecal material, is the first member of the extensive  
10   crAssphage family to be grown in pure culture. The bacteriophage infects the human symbiont  
11   *Bacteroides intestinalis*, confirming *in silico* predictions of the likely host. Genome analysis  
12   demonstrated that the phage DNA is 102 kb in size, has an unusual genome organisation and does  
13   not possess any obvious genes for lysogeny. In addition, electron microscopy confirms that  
14   φcrAss001 has a podovirus-like morphology. Despite the absence of lysogeny genes, φcrAss001  
15   replicates in a way that does not disrupt proliferation of the host bacterium and is able to maintain  
16   itself in continuous host culture.

17

18           Keywords: crAssphage, crAss-like phages, human gut virome, bacteriophage, *Bacteroides*.

19

20

21           The human gut virome contains a vast number of bacterial, mammalian, plant, fungal and  
22   archaeal viruses<sup>1-3</sup>. There is a growing body of evidence supporting specific and consistent  
23   alterations of the gut virome in a number of human diseases and conditions, including inflammatory  
24   bowel disease (IBD), malnutrition, and AIDS<sup>4-6</sup>. Currently, our understanding of the physiological  
25   significance of the human gut virome is limited by the fact that the vast majority of these viruses

26 cannot be taxonomically classified or linked to any particular hosts (so-called “viral dark matter”<sup>7</sup>).  
27 Several recent studies identified a highly abundant (representing up to 90% of gut viruses in some  
28 individuals), unique uncultured group termed crAss-like phages or crAssphage<sup>8-11</sup>. Here we report  
29 on the first successful isolation of a crAssphage on a single host and describe its key biological  
30 properties. Based on electron microscopy of propagated crAssphage001 morphology we confirm  
31 that crAss-like phages possess podovirus-like morphology. We also demonstrate the ability of the  
32 phage to stably co-replicate with its *Bacteroides intestinalis* host in equilibrium for many  
33 generations *in vitro*, which mimics earlier observed ability of crAss-like phages to maintain stable  
34 colonization of the mammalian gut<sup>11,12</sup>.

35

36 In 2014, a study by Dutilh *et al.*<sup>8</sup> demonstrated the presence in ~50% of human samples of  
37 highly abundant sequences, which when cross-assembled from multiple sources, indicated the  
38 presence of a unique bacteriophage they named crAssphage (cross Assembly). The fully assembled  
39 97 kb DNA genome showed no homology to any known virus, even though in some subjects it  
40 completely dominated the gut virome (up to 90% of sequencing reads). Indirect evidence suggested  
41 that *Bacteroides* species is a likely host<sup>8</sup>. A later study, based on detailed sequence analysis of  
42 proteins encoded by this phage, predicted *Podoviridae*-like morphology and placed it into the novel  
43 diverse and expansive family-level phylogenetic group of loosely related bacteriophages termed  
44 crAss-like phages<sup>9</sup>. Genomes of members of this group are highly abundant in the human gut and  
45 are also present in other diverse habitats including termite gut, terrestrial/groundwater, and  
46 oceans<sup>9,13,14</sup>. However, in the absence of a known host, no member of this family has been isolated  
47 and nothing is known of the biological properties of these crAss-like phages from the human gut.

48 In a recent analysis<sup>11</sup>, we *de novo* assembled 244 genomes of crAss-like phages from the  
49 human gut and classified them into several genus- and subfamily-level taxonomic groups based on  
50 percentage of shared orthologous genes. As a result of this study, we can state that 98-100% of

51 healthy adults from Western cohorts carry at least one or more types of crAss-like phages, albeit  
52 with widely varying relative abundance. Here, we report the first documented isolation in culture of  
53 a crAss-like phage from the human gut virome and describe its key biological properties.

54 The replication strategy of crAss-like bacteriophages is unknown and all attempts to use  
55 standard plaque assays on semi-solid agar have failed. We therefore attempted to detect crAss-like  
56 phage replication using a broth enrichment strategy. Phage-enriched filtrates of faecal samples were  
57 collected from 20 healthy adult Irish volunteers, pooled and used to infect pure cultures of 53  
58 bacterial strains representing the commensal human gut microbiota (Supplementary Table 1). After  
59 three successive rounds of enrichment, cell free supernatants were subjected to shotgun  
60 metagenomic sequencing. Analysis of the assembled sequencing reads demonstrated that the  
61 supernatant from strain *Bacteroides intestinalis* 919/174 was dominated by a single 102.7 kb contig  
62 (~98% of reads) related to a known but previously uncultured crAss-like bacteriophage, IAS virus,  
63 isolated from the human gut<sup>9,15</sup>. All other species of *Bacteroides* tested were insensitive to  
64  $\phi$ crAss001.

65 The genome of bacteriophage  $\phi$ crAss001 is 102,679 bp and is circular or circularly permuted.  
66 We identified 105 protein coding genes (ORFs of length 90-7,239 bp) and 25 tRNA genes specific  
67 for 17 different amino acids. Cumulative G+C content of the phage genome is 34.7%, which is  
68 significantly lower than that of published *B. intestinalis* genomes (42.8-43.5%). An interesting  
69 structural feature of the genome is its apparent division into two parts of roughly equal size with  
70 strictly opposite gene orientation and inverted GC skew, possibly reflecting the direction of  
71 transcription and/or replication (Figure 1). Functional gene annotation was performed using a  
72 comprehensive approach, which included BLASTp amino acid sequence homology searches against  
73 NCBI nt database, hidden Markov model (HMM) searches against UniProtKB/TrEMBL database<sup>16</sup>  
74 and profile-profile HMM searches with HHpred against PDB, PFAM, NCBI-CDD and TIGRFAM  
75 databases<sup>17,18</sup>. This allowed for the functional annotation of 57 genes and assignment of further 11

76 genes to conserved protein families with unknown functions. Ten identifiable structural protein  
77 genes (phage head, tail, appendages) as well as three genes responsible for lytic functions were  
78 clustered on the right-hand side of the genome, suggesting that the remaining un-annotated genes in  
79 this part of the genome may also be responsible for structure and assembly of phage particles, as  
80 well as cell lysis. By contrast, the left-hand side predominantly harboured genes involved in  
81 replication, recombination, transcription and nucleotide metabolism. Putative DNA-binding and  
82 transcriptional regulation proteins were located in the proximal portions of the two oppositely  
83 oriented genome halves, suggesting their role in governing the transcription of gene modules  
84 located downstream on both sides of the genome (Fig. 1). Two genes (3,  $\beta$ -fructosidase and 5,  
85 ferredoxin-thioredoxin reductase) were predicted to be involved in auxiliary metabolic processes, in  
86 that they are unrelated with phage replication and virion assembly. No identifiable lysogeny  
87 module, or integrase or recombinase genes were identified. MALDI-TOF analysis of virion proteins  
88 separated by SDS-PAGE identified presence of most of the predicted structural proteins.  
89 Unexpectedly, three high molecular weight subunits of phage RNA polymerase<sup>9</sup> (gene products 47,  
90 49 and 50) were also detected as part of virion structure (Fig. 2a).

91 TEM (transmission electron microscopy) of  $\phi$ crAss001 virions revealed a podoviral  
92 morphology (Fig. 2b). Phage heads are isometric with a diameter of  $77.2 \pm 3.3$  nm (mean  $\pm$  SD). Tails  
93 are  $36.1 \pm 3.6$  nm long with elaborate structural features and several side appendages of variable  
94 length. This is in agreement with our previous TEM observations of podoviruses of similar  
95 dimensions ( $\sim 76.5$  nm in diameter) from a faecal sample rich in a mixture of several highly  
96 prevalent crAss-like bacteriophages<sup>11</sup>.

97 According to the recently proposed classification scheme based on functional gene repertoire  
98 and protein sequence homology<sup>9</sup>,  $\phi$ crAss001 fits into the IAS virus subgroup<sup>15</sup> of crAss-like  
99 bacteriophages (Fig. 2c). Our recent analysis identified a common presence of similar uncultured  
100 bacteriophages in the gut microbiotas of healthy Irish and US adults, Irish elderly people, as well as

101 in healthy Irish infants and healthy and malnourished Malawian infants<sup>11</sup>, where they were  
102 detectable in 62%, 44%, 50%, 10%, 14% and 16% of cases, respectively, and in some case  
103 represented up to 61% of virome reads (Fig. S1).

104 When genomes of  $\phi$ crAss001, IAS virus and other related putative phages were compared,  
105 most of the sequence variability (including variation in the number and size of ORFs) was  
106 concentrated in a region putatively coding for tail spike/tail fiber subunits (gene products 22, 23, 25,  
107 26, Fig. 2c). This suggests high level of variability of receptor-binding proteins and potentially high  
108 level of host specialization of crAss-like phages.

109  $\Phi$ crAss001 could be effectively propagated *in vitro* using standard techniques using an EPS-  
110 producing *B. intestinalis* 919/174 as its host. It was able to form readily visible plaques in agar  
111 overlays (Fig. 2d) and reached  $10^{10}$  pfu/mL when propagated in broth culture. In a one-step growth  
112 experiment with multiplicity of infection (MOI) of  $\sim 1$  the phage demonstrated a long latent period  
113 of 120 min that was followed with a very small burst of progeny (2.5 pfu per infected cell). A  
114 second burst of roughly the same size occurred 90 min later (Fig. S2a). An adsorption curve shows  
115 that  $\sim 74\%$  of phage bound to cells in first 5 min, and  $>90\%$  were bound by 20 min (Fig. S2b).  
116 Efficiency of lysogeny/mutation rate tests demonstrated  $2\pm 1\%$  of cells of the strain 919/174 are  
117 resistant to  $\phi$ crAss001 on initial contact. These clones (potentially lysogens) were initially PCR  
118 positive for presence of  $\phi$ crAss001 (using gene 20 as a target) and were resistant to the phage in  
119 plaque/spot assays. Successive rounds of propagation resulted in loss of the  $\phi$ crAss001 PCR  
120 positive outcome, but the phage-resistance phenotype was retained in all clones.

121 Infection of exponentially growing cells of *B. intestinalis* 919/174 with  $\phi$ crAss001 at different  
122 multiplicity of infections (MOI) did not result in complete culture lysis, but caused a delay in  
123 stationary phase onset time and final density at stationary phase (Fig. S2c). A brief lysis period  
124 occurred in the first few hours after infection, with timing dependent on the MOI, followed by  
125 recovery of bacterial growth. In order to investigate the fate of phage in co-culture, bacterial cells

126 infected with phage at high MOI were allowed to reach stationary phase and then passaged daily or  
127 bi-daily for a period of 23 days (Fig. 2e). Phage titre, which on the first two passages reached  $\sim 10^{10}$ ,  
128 was reduced and remained steady between  $10^6$ - $10^8$  for the duration of the experiment.

129 Collectively, this suggests that  $\phi$ crAss001 uses an unusual infection strategy to replicate *in*  
130 *vitro* on its *B. intestinalis* host very efficiently on semi-solid agar (giving rise to large clear plaques)  
131 and yet propagate in liquid culture without causing lysis of the host bacterium. Despite not being  
132 able to form true lysogens or pseudolysogens, the phage seem to be able to co-exist with its host in  
133 an equilibrium which is likely to confer an ecological advantage to both partners (similar to the  
134 recently described carrier state life cycle<sup>19</sup>). Taken together, these results are puzzling. Given that in  
135 liquid culture we used an MOI of 1 and there is a high adsorption rate, we cannot explain why two  
136 bursts seemed to occur and why the broth culture did not clear. We can conclude that the phage  
137 probably causes a successful lytic infection in a subset of infected cells (giving rise to a ‘false’  
138 overall burst size of 2.5), but must enter into an alternative interaction with some or all of the  
139 remaining cells. Overall, this allows both phage and host to co-exist in a stable interaction over  
140 prolonged passages. This may explain why the *Bacteroides* host and crAssphage can both remain in  
141 high numbers for prolonged period in the gut. The nature of this interaction warrants further  
142 investigation.

143 Published studies of gut viromes in humans and germ-free mice with transplanted human  
144 viromes<sup>12,20</sup>, as well as our own unpublished longitudinal observations of the human gut virome  
145 support the hypothesis that crAssphage use an unusual strategy to establish themselves at high  
146 levels in the gut and to then persist stably within the microbial communities for several weeks to as  
147 long as several months or even years. The absence of any detectable integrase gene and our inability  
148 to isolate stable lysogens, together with the lack of any evidence that this or any other crAss-like  
149 bacteriophages can occur in the form of prophages, suggest that pseudolysogeny and other  
150 mechanisms, such as physical binding of phage to the intestinal mucous gel<sup>21</sup> might be responsible

151 for long term persistence of crAss-like phages *in vivo*. Further studies will be required to fully  
152 understand the replication cycle of crAss-like bacteriophages, their peculiar ability to persist at high  
153 titres in the human gut microbiota, as well as their significance for human intestinal physiology and  
154 disease. The first report of a phage-host pair should accelerate our understanding of these highly  
155 abundant and unusual phages.

156

157

## 158 **Figure legends**

159 **Figure 1. Circular map of  $\phi$ crAss001 genome.** Inner circle (green and blue), GC skew;  
160 Middle circle (black), G+C content; Outer circle (Pink and purple fill), protein-coding genes  
161 (ORFs); Outermost circle (orange fill), tRNA genes. Stroke colour on ORFs and fill colour on gene  
162 numbers corresponds with the general predicted function (see colour legend for details); black  
163 stroke, introns; genes with no functional annotations (coding for hypothetical proteins) are left  
164 unlabelled.

165

166 **Figure 2. Morphology, growth and adsorption of  $\phi$ crAss001.** **A**, SDS-PAGE analysis of  
167 protein content in  $\phi$ crAss001 virions and identification of selected polypeptides using MALDI-TOF  
168 (see methods for details); **B**, TEM image of uranyl acetate negatively contrasted  $\phi$ crAss001 virions  
169 (62,000x magnification, accelerating voltage of 120kV); **C**, BLASTn comparisons between the  
170 genome of the uncultured human faecal IAS virus,  $\phi$ crAss001, and uncultured human phage  
171 genomic contigs ERR843986\_ms\_1, ERR844058\_ms\_2, SRR4295175\_s\_4 (for contigs description  
172 see Guerin *et al.*, 2018<sup>1</sup>), highly variable region is marked with a red asterisk; **D**, plaque  
173 morphology of  $\phi$ crAss001 after 48 h incubation in a 0.3% FAA agar overlay with *B. intestinalis*  
174 919/174 as host strain; **E**, persistence of  $\phi$ crAss001 in a periodic culture of phage infected *B.*

175 *intestinalis* 919/174 with daily (or bi-daily) transfers for 23 days (see supplementary methods for  
176 details).

177

## 178 **References**

1. Ogilvie, L. A. & Jones, B. V. The human gut virome: a multifaceted majority. *Front. Microbiol.* **6**, (2015).
2. Carding, S. R., Davis, N. & Hoyles, L. Review article: the human intestinal virome in health and disease. *Aliment. Pharmacol. Ther.* **46**, 800–815 (2017).
3. Manrique, P. *et al.* Healthy human gut phageome. *Proc. Natl. Acad. Sci. U. S. A.* **113**, 10400–10405 (2016).
4. Norman, J. M. *et al.* Disease-specific Alterations in the Enteric Virome in Inflammatory Bowel Disease. *Cell* **160**, 447–460 (2015).
5. Reyes, A. *et al.* Gut DNA viromes of Malawian twins discordant for severe acute malnutrition. *Proc. Natl. Acad. Sci. U. S. A.* **112**, 11941–11946 (2015).
6. Monaco, C. L. *et al.* Altered Virome and Bacterial Microbiome in Human Immunodeficiency Virus-Associated Acquired Immunodeficiency Syndrome. *Cell Host Microbe* **19**, 311–322 (2016).
7. Aggarwala, V., Liang, G. & Bushman, F. D. Viral communities of the human gut: metagenomic analysis of composition and dynamics. *Mob. DNA* **8**, 12 (2017).
8. Dutilh, B. E. *et al.* A highly abundant bacteriophage discovered in the unknown sequences of human faecal metagenomes. *Nat. Commun.* **5**, ncomms5498 (2014).
9. Yutin, N. *et al.* Discovery of an expansive bacteriophage family that includes the most abundant viruses from the human gut. *Nat. Microbiol.* **3**, 38–46 (2018).
10. Liang, Y. Y., Zhang, W., Tong, Y. G. & Chen, S. P. crAssphage is not associated with diarrhoea and has high genetic diversity. *Epidemiol. Amp Infect.* **144**, 3549–3553 (2016).
11. Guerin, E. *et al.* Biology and taxonomy of crAss-like bacteriophages, the most abundant virus in the human gut. *bioRxiv* 295642 (2018). doi:10.1101/295642
12. Yarygin, K. *et al.* Abundance profiling of specific gene groups using precomputed gut metagenomes yields novel biological hypotheses. *PLOS ONE* **12**, e0176154 (2017).
13. Cinek, O. *et al.* Quantitative CrAssphage real-time PCR assay derived from data of multiple geographically distant populations. *J. Med. Virol.* **90**, 767–771 (2018).
14. Holmfeldt, K. *et al.* Twelve previously unknown phage genera are ubiquitous in global oceans. *Proc. Natl. Acad. Sci.* **110**, 12798–12803 (2013).



15. Oude Munnink, B. B. *et al.* Unexplained diarrhoea in HIV-1 infected individuals. *BMC Infect. Dis.* **14**, 22 (2014).
16. González-Tortuero, E. *et al.* VIGA: a sensitive, precise and automatic de novo Viral Genome Annotator. *bioRxiv* 277509 (2018). doi:10.1101/277509
17. Söding, J., Biegert, A. & Lupas, A. N. The HHpred interactive server for protein homology detection and structure prediction. *Nucleic Acids Res.* **33**, W244–W248 (2005).
18. Zimmermann, L. *et al.* A Completely Reimplemented MPI Bioinformatics Toolkit with a New HHpred Server at its Core. *J. Mol. Biol.* (2017). doi:10.1016/j.jmb.2017.12.007
19. Siringan, P., Connerton, P. L., Cummings, N. J. & Connerton, I. F. Alternative bacteriophage life cycles: the carrier state of *Campylobacter jejuni*. *Open Biol.* **4**, 130200 (2014).
20. Reyes, A., Wu, M., McNulty, N. P., Rohwer, F. L. & Gordon, J. I. Gnotobiotic mouse model of phage–bacterial host dynamics in the human gut. *Proc. Natl. Acad. Sci. U. S. A.* **110**, 20236–20241 (2013).
21. Barr, J. J. *et al.* Bacteriophage adhering to mucus provide a non–host-derived immunity. *Proc. Natl. Acad. Sci.* **110**, 10771–10776 (2013).

179

## 180 **End notes**

181 **Acknowledgements:** This research was conducted with the financial support of Science  
182 Foundation Ireland (SFI) under Grant Number SFI/12/RC/2273 a Science Foundation Ireland's  
183 Spokes Programme which is co-funded under the European Regional Development Fund under  
184 Grant Number SFI/14/SP APC/B3032, and a research grant from Janssen Biotech, Inc.

185 **Supplementary Information** is available in the online version of the paper (Supplementary  
186 table 1, Supplementary figure 1, Supplementary figure 2, Supplementary methods)

187 **Author contributions:** ANS, EVK and CBF performed the experiments; ANS, SRS, LAD,  
188 RPR and CH analysed the data; RPR and CH supervised the project.

189 **Author information:** Reprints and permissions information is available at  
190 [www.nature.com/reprints](http://www.nature.com/reprints). The authors declare no competing financial interests. Correspondence  
191 and requests for materials should be addressed to CH ([c.hill@ucc.ie](mailto:c.hill@ucc.ie)) or ANS  
192 ([andrey.shkoporov@ucc.ie](mailto:andrey.shkoporov@ucc.ie)).

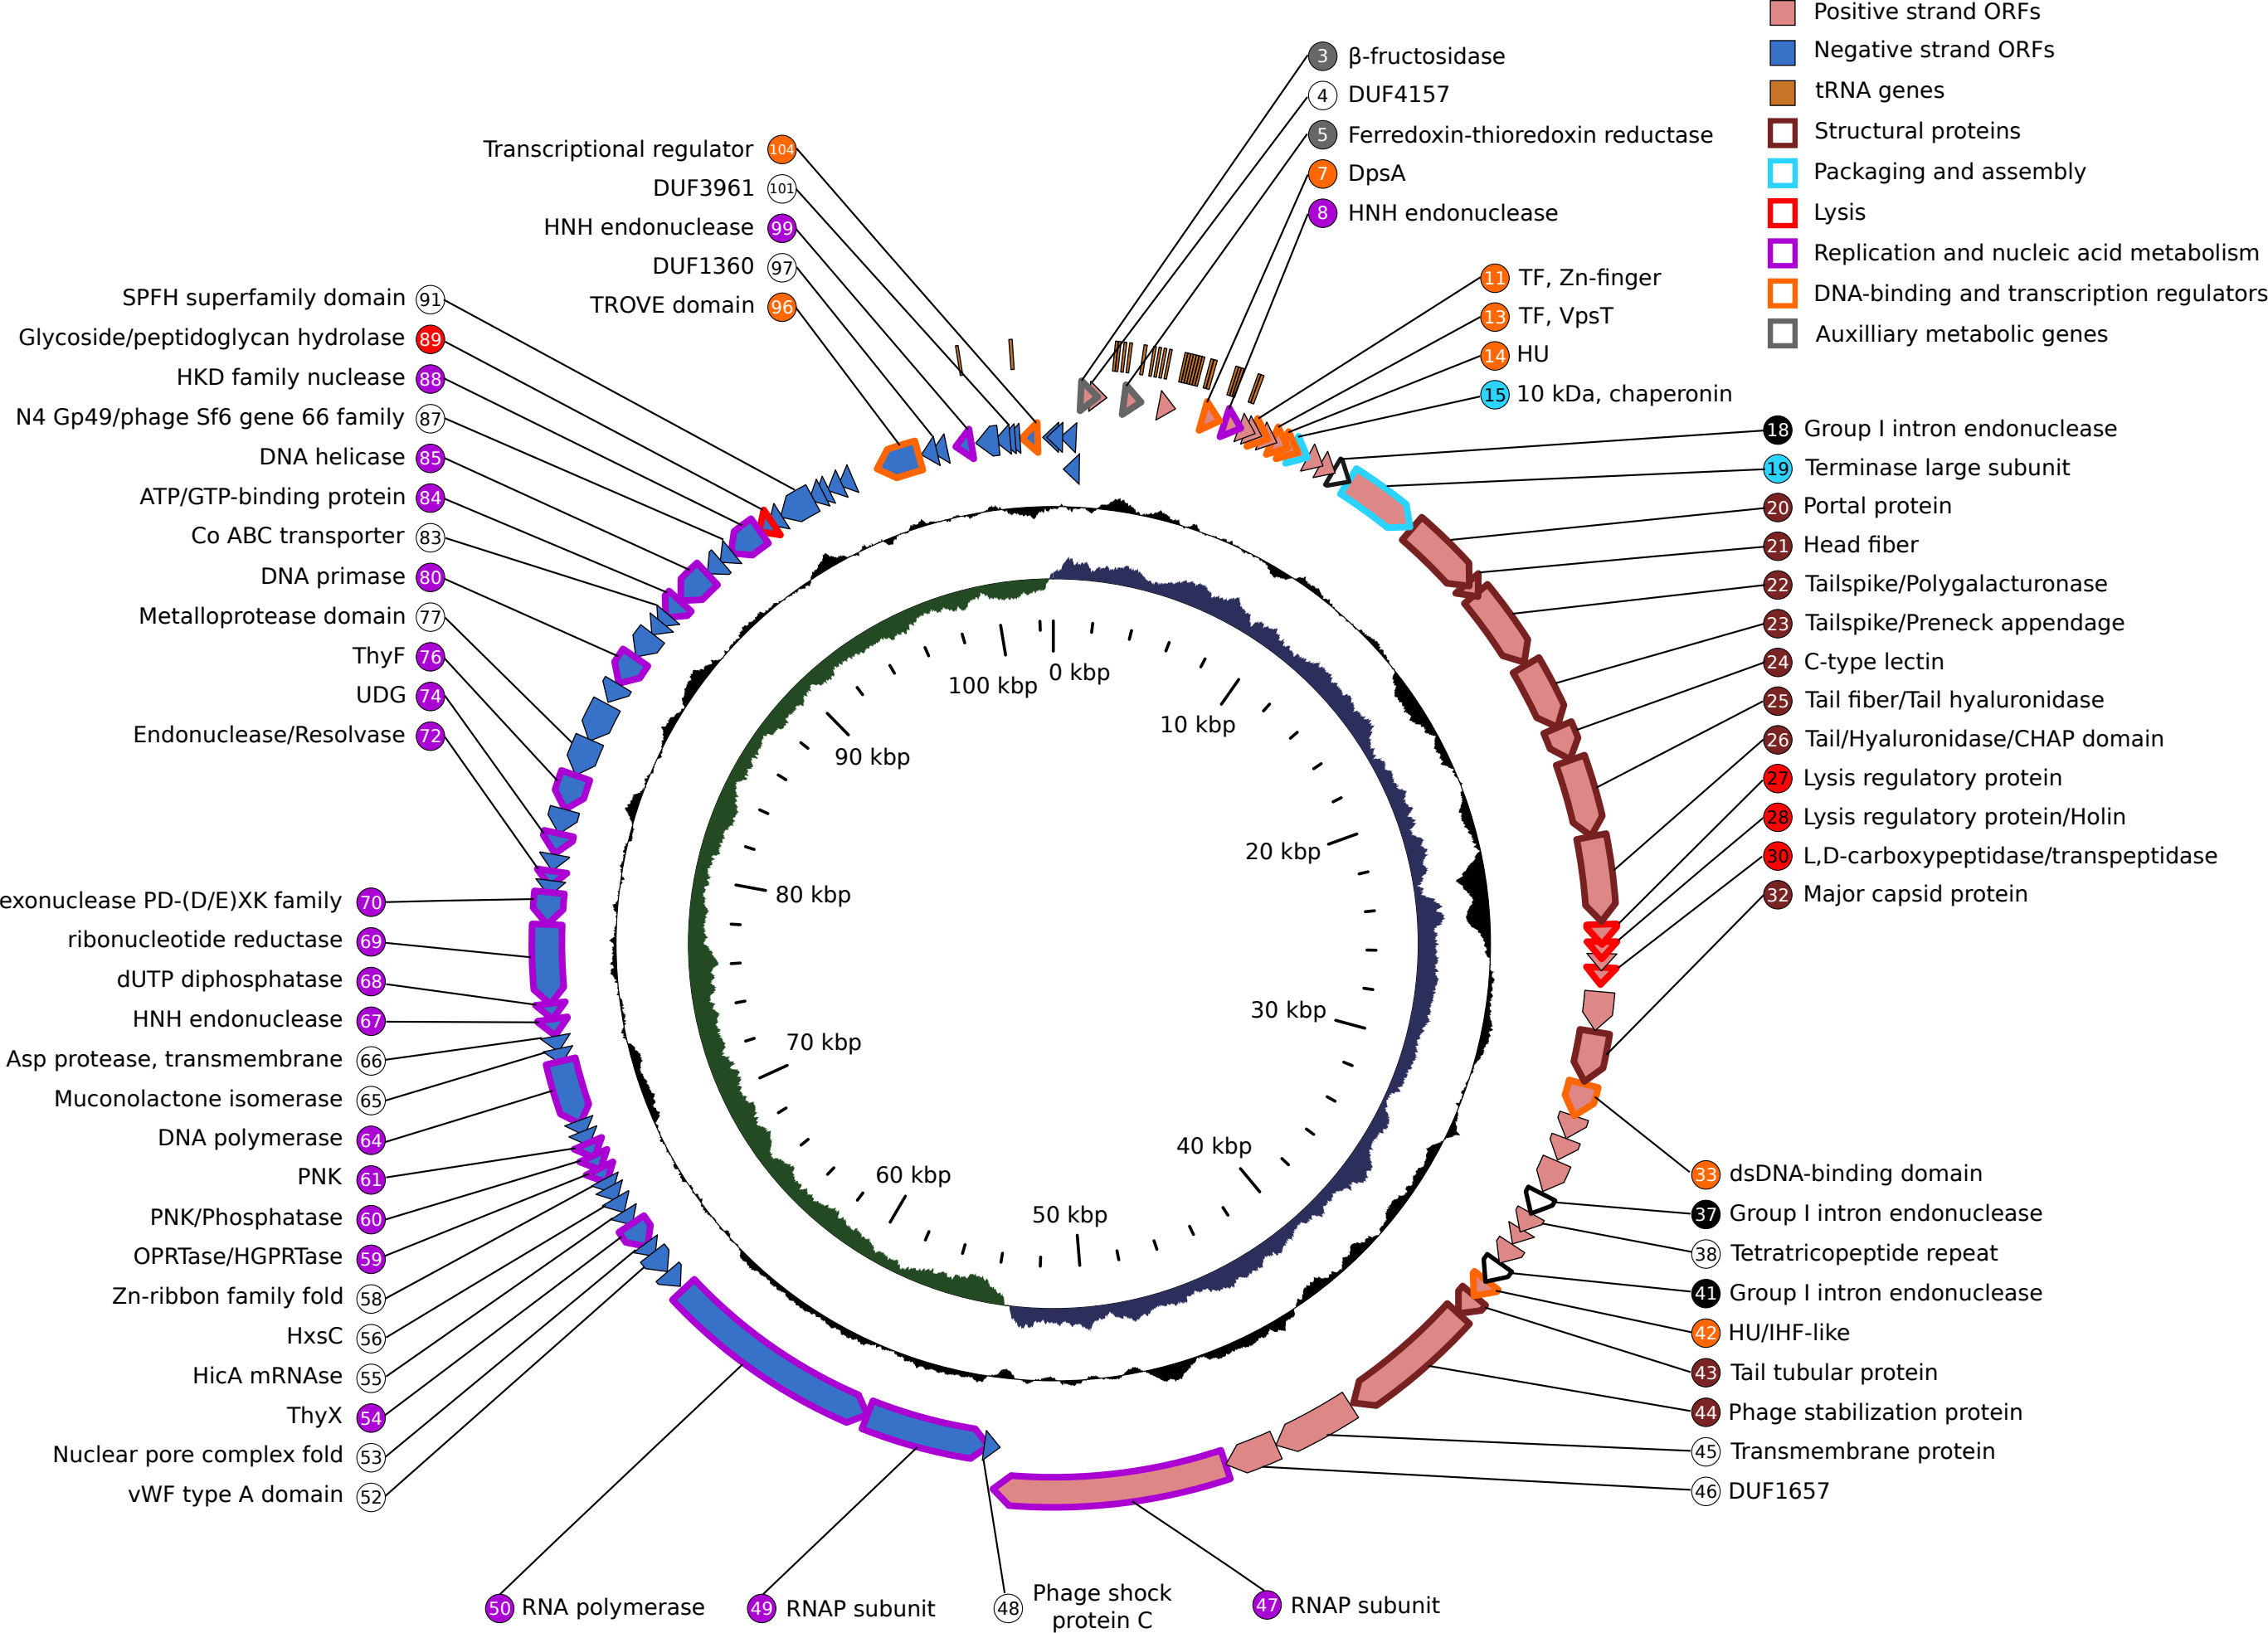

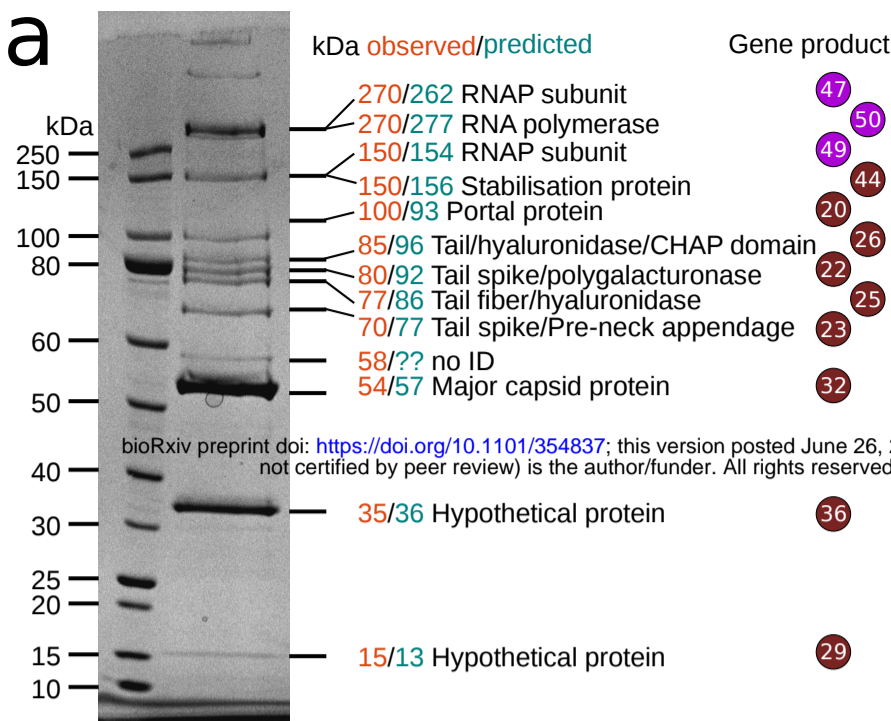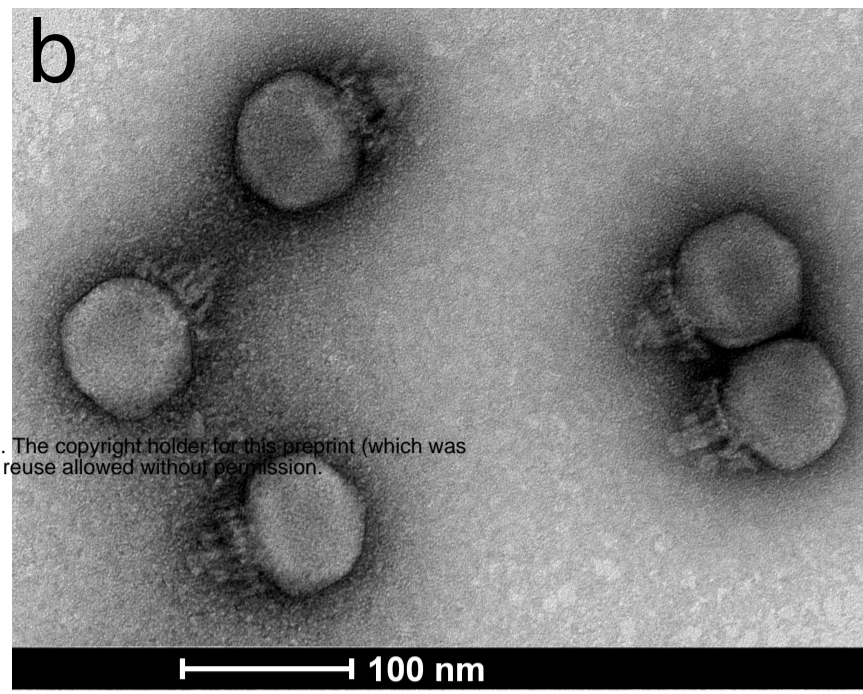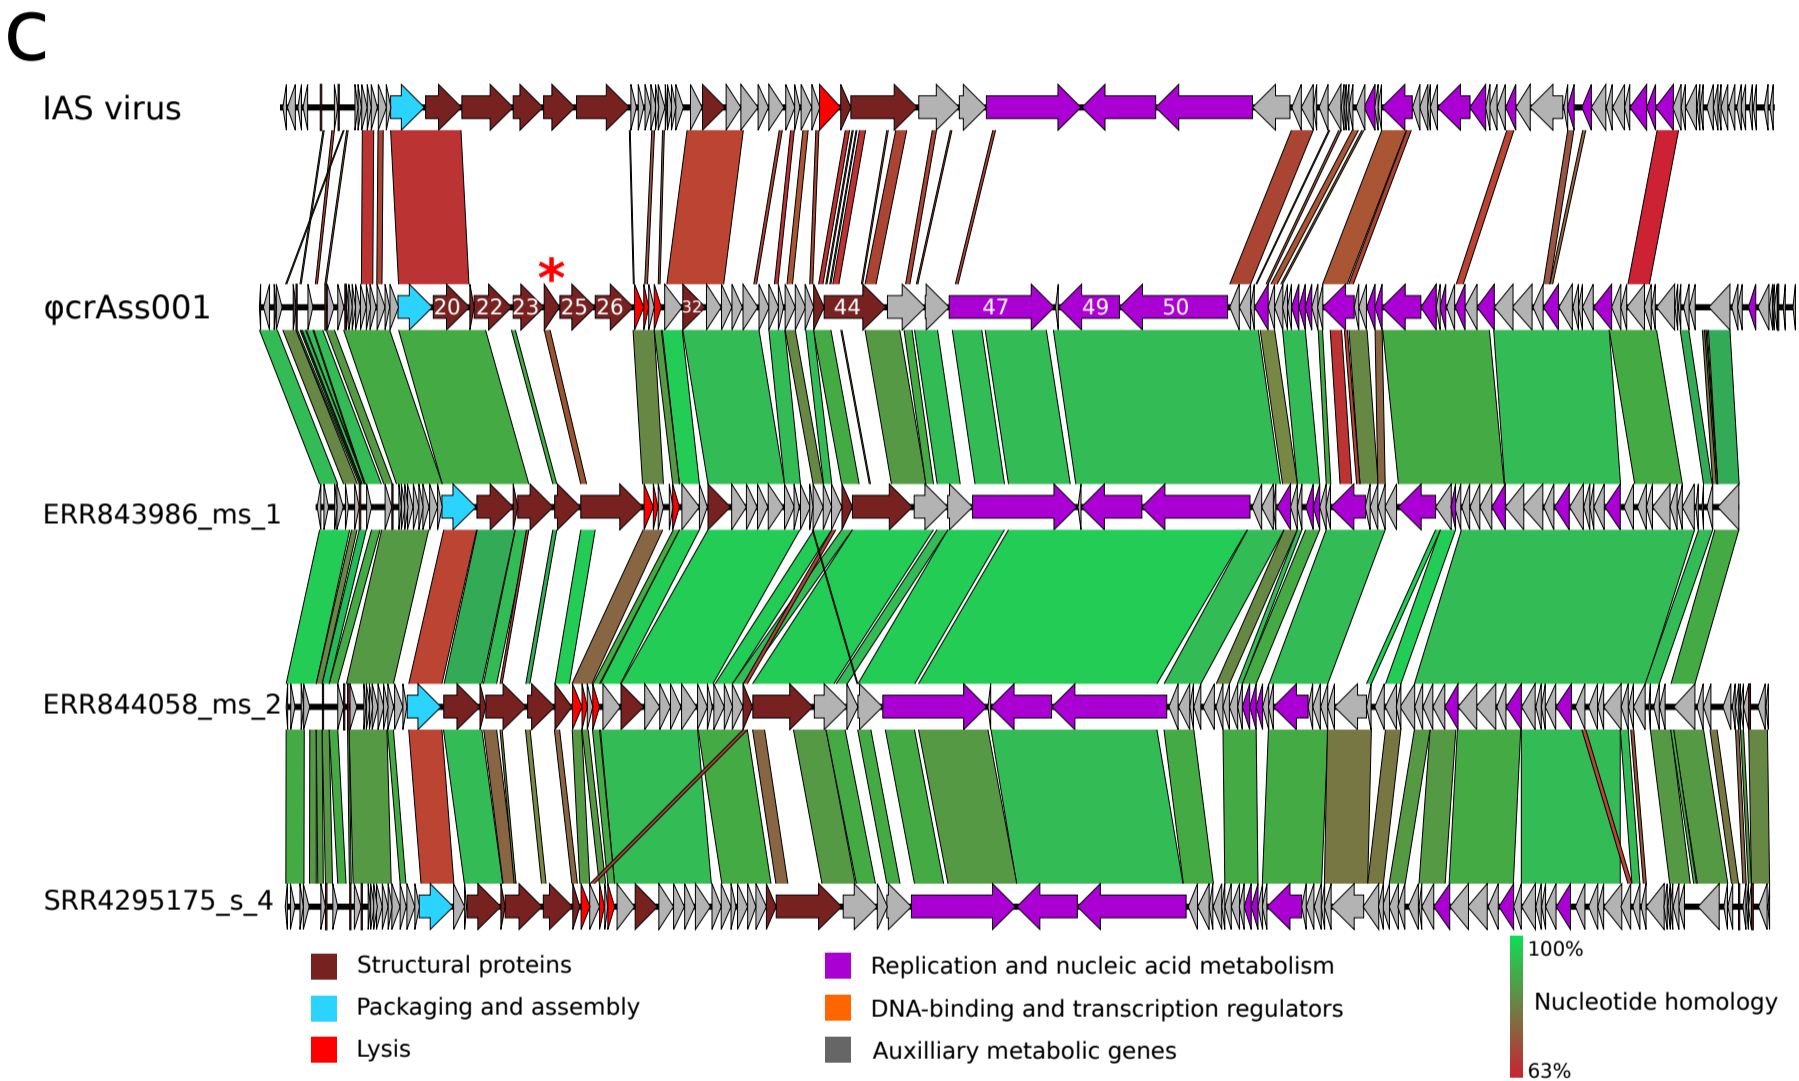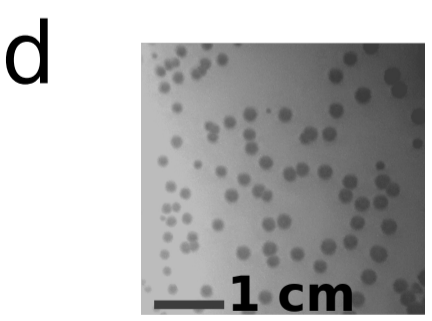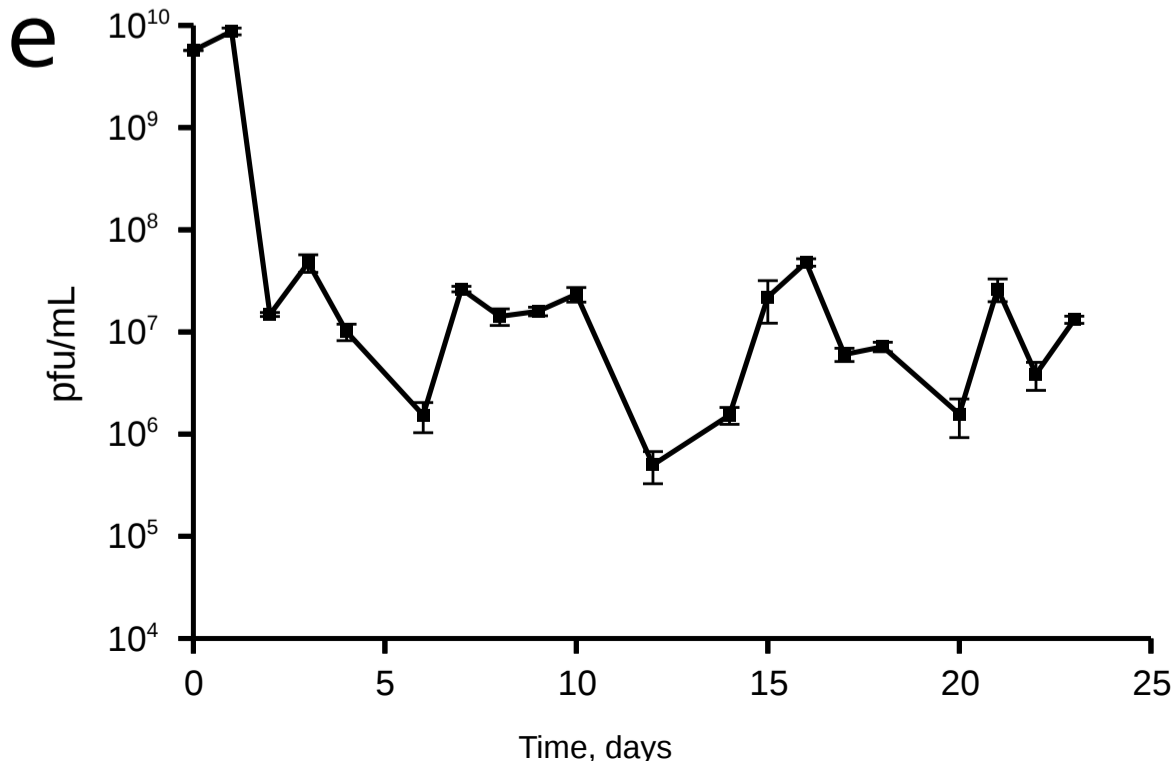

Source: https://www.biorxiv.org/content/10.1101/354837v1.full.pdf
